# Supplementary figures and images for: A TDG/CBP/RARα Ternary Complex Mediates the Retinoic Acid-dependent Expression of DNA Methylation-sensitive Genes
Source: PubMed Central journal article supplement — Genomics Proteomics Bioinformatics. 2014 Jan 3;12(1):8–18. doi: 10.1016/j.gpb.2013.11.001 (PMC4411359; doi:10.1016/j.gpb.2013.11.001), 2014-01-03

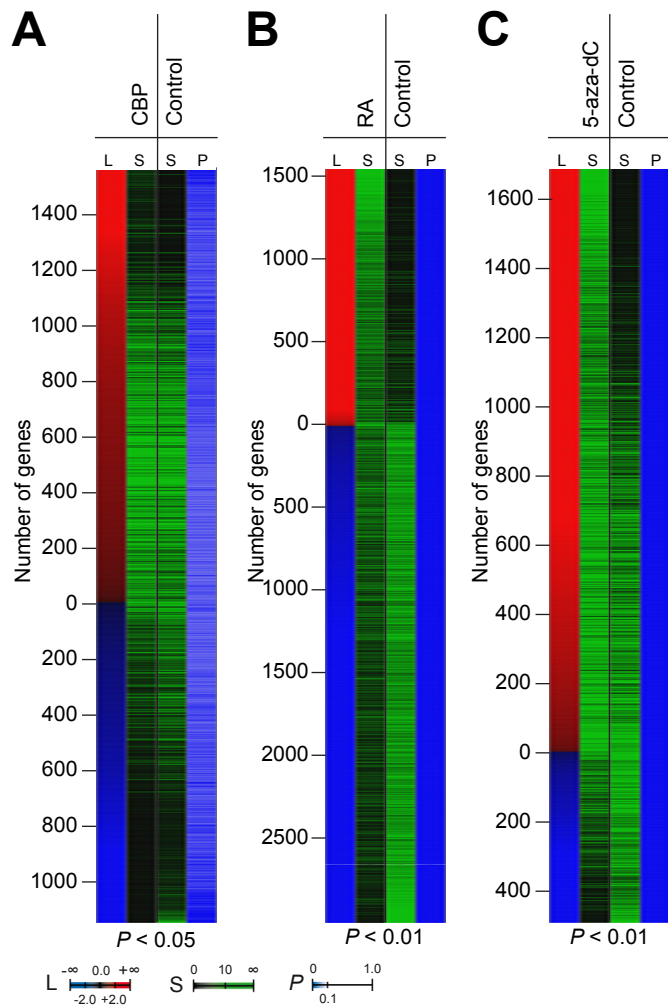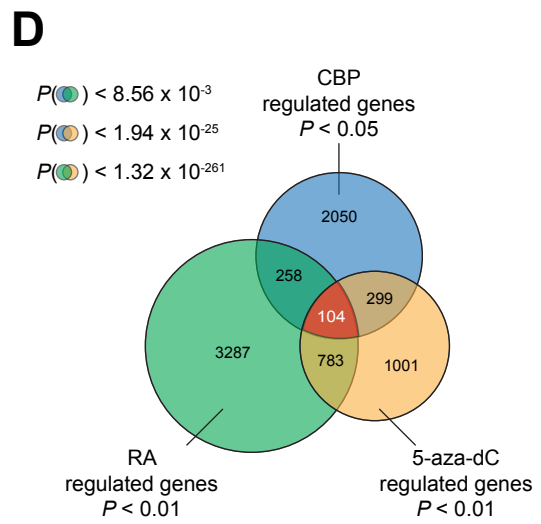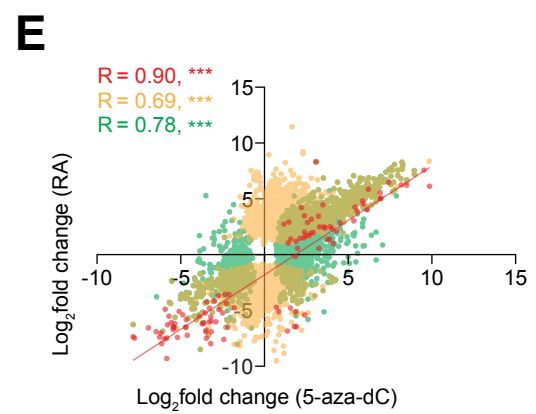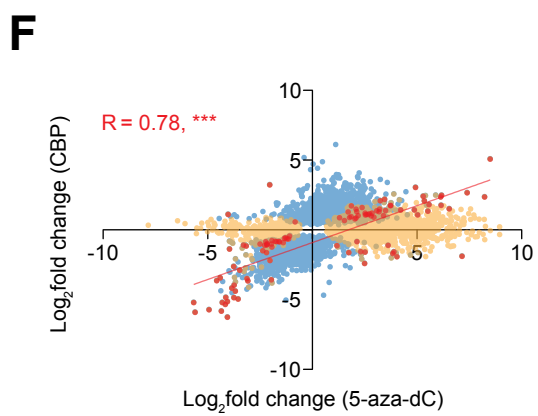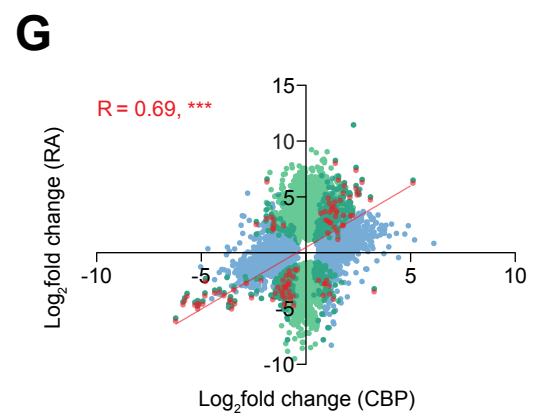

Supplement: mmc1.pdf [file mmc1.pdf]

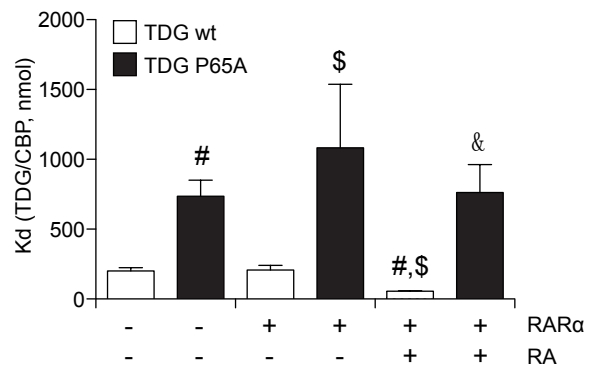

Supplement: mmc2.pdf [file mmc2.pdf]
